# Supplementary material for: Dissociating predictability, plausibility and possibility of sentence continuations in reading: evidence from late-positivity ERPs
Source: PeerJ journal article supplement (doi:10.7717/peerj.5717), 2018-10-12
Supplement: Supplemental_Table_S2.pdf [file Supplemental_Table_S2.pdf]

**Table S2.** Interpolated electrodes

| Participant | Interpolated electrode(s) |
|-------------|---------------------------|
| 2           | P4                        |
| 16          | T8                        |
| 18          | C3                        |
| 20          | O2                        |
| 21          | P3                        |
| 32          | T7, T8                    |
